# Supplementary material for: NK-92 cells retain vitality and functionality when grown in standard cell culture conditions
Source: PLoS One. 2022 Mar 16;17(3):e0264897. doi: 10.1371/journal.pone.0264897 (PMC8926178; doi:10.1371/journal.pone.0264897)
Supplement: S1 Table — (XLSX) [file pone.0264897.s002.xlsx]

## Sheet: Tabelle1
MTT assay Fig1
	NK-92med			RPMIf			RPMIp					OD MTT 590nm	NK-92				RPMIf				RPMIp
	Mean	SD	N	Mean	SD	N	Mean	SD	N			immediately	0.188	0.181	0.189	0.176	0.13	0.133	0.131	0.136	0.303	0.321	0.331	0.332
immediate	1	0.006137	4	1	0.002646	4	1	0.013451	4			24h	0.173	0.168	0.182	0.176	0.18	0.182	0.163	0.16	0.419	0.41	0.389	0.462
24h	0.952316	0.005852	4	1.29245	0.011354	4	1.30536	0.030692	4			48h	0.292	0.23	0.25	1.051	0.289	0.263	0.305	1.229	0.73	0.607	0.642	0.654
48h	1.40236	0.031644	4	2.15598	0.021197	4	2.04584	0.051823	4
CFSE assay Fig1
	NK-92			RPMIf			RPMIp					CFSE expression MFI	immediate				24h				48h
	Mean	SD	N	Mean	SD	N	Mean	SD	N			NK-92	3410.3	3393.23	3493.76	3398.18	1505.2	1459.19	1499.71	1372.16	546.77	505.05	481.96	497.22
immediate	1	0.013769	3	1	0.021481	3	1	0.002812	3			RPMI	5463.73	6925.31	6889.04	7165.47	3211.33	3948.2	3958	3974.96	1856.21	2108.11	2155.88	2210.27
24h	0.426145	0.017951	3	0.566314	0.001936	3	0.522456	0.000656	3			Plate	6703.12	7811.51	7807.53	7847.46	3509.79	4087.64	4081.22	4091.36	1706.82	1921.18	1930.94	1995.41
48h	0.144498	0.00343	3	0.308595	0.007309	3	0.249186	0.005157	3
Surface staining Fig2
MFI
Antibody	Background	NK-92	RPMIf	RPMIp
CD2	80.3	2183.8	6272.55	8113.6
CD158	258.7	175.4	275.7	269.3
NKp30	297.9	433.1	483.5	667.4
DNAM-1	86.4	144.6	96.8	74.7
CD16	86.4	23.8	25.15	26.55
NKp44	82.5	6136.5	6487.7	8010.2
2B4	119.9	1698.3	2274.55	2008.9
CD56	80.3	2183.8	6272.55	8113.6
TIGIT	82.6	93.35	93.35	140.85
NKp46	297.9	570.4	781.85	730.55
NTB-A	87.25	7880.8	9383.9	11596.1
CD84	258.7	193.5	291.85	279.3
NKG2D	297.9	1971.5	2004.45	2045.65
PD-1	297.9	253.2	342.5	357.3
CEACAM-1	297.9	697.5	791.45	958.8
KIR2DL4	258.7	197.4	299.7	297.8
Activation assay Fig3
IFNγ		NK-92			RPMIf			RPMIp
		Mean	SD	N	Mean	SD	N	Mean	SD	N		OD 650nm	NK-92				RPMIf				RPMIp
untreated		0.085	0.002449	4	0.085	0.008287	4	0.09375	0.01565	4		untreated	0.087	0.084	0.082	0.087	0.075	0.089	0.082	0.094	0.085	0.089	0.084	0.117
A549		0.117	0.009522	4	0.08275	0.011087	4	0.08425	0.012093	4		A549	0.119	0.123	0.123	0.103	0.091	0.067	0.09	0.083	0.081	0.102	0.075	0.079
CIR		0.1375	0.012261	4	0.123	0.008042	4	0.186	0.187391	4		CIR	0.125	0.131	0.141	0.153	0.133	0.125	0.12	0.114	0.086	0.094	0.467	0.097
RKO		0.27725	0.07813	4	0.09425	0.017289	4	0.11675	0.015798	4		RKO	0.19	0.259	0.281	0.379	0.118	0.078	0.086	0.095	0.139	0.102	0.115	0.111
T47D		0.3995	0.231684	4	0.278	0.096575	4	0.35925	0.116191	4		T47D	0.322	0.11	0.539	0.627	0.191	0.415	0.239	0.267	0.198	0.359	0.413	0.467
RAJI		0.8555	0.189375	4	1.0935	0.053119	4	1.1095	0.041988	4		RAJI	1.128	0.83	0.765	0.699	1.127	1.134	1.095	1.018	1.167	1.074	1.114	1.083
K562		0.59825	0.106174	4	1.3875	0.206122	4	1.67025	0.149246	4		K562	0.645	0.613	0.446	0.689	1.469	1.631	1.291	1.159	1.851	1.645	1.696	1.489
721221		1.485	0.132798	4	1.669	0.299757	4	0.5675	0.095605	4		721221	1.492	1.643	1.318	1.487	1.593	1.872	1.278	1.933	0.612	0.679	0.51	0.469
IFNγ		NK-92			RPMIf			RPMIp
		Mean	SD	N	Mean	SD	N	Mean	SD	N		OD 650nm	NK-92				RPMIf				RPMIp
untreated		0.08875	0.018025	4	0.17275	0.090934	4	0.21525	0.056216	4		untreated	0.087	0.064	0.104	0.1	0.3	0.127	0.172	0.092	0.213	0.184	0.169	0.295
IL-15		0.269	0.022789	4	1.76225	0.027561	4	1.74575	0.061614	4		IL-15	0.247	0.264	0.301	0.264	1.803	1.744	1.755	1.747	1.704	1.775	1.818	1.686
IL-12		2.27	0.112036	4	2.51475	0.060999	4	2.78975	0.282482	4		IL-12	2.128	2.278	2.402	2.272	2.56	2.471	2.454	2.574	2.73	3.123	2.862	2.444
IL-12 + IL-18		2.99775	0.161836	4	3.14875	0.015543	4	3.0505	0.016543	4		IL-12 + IL-18	2.8	2.931	3.126	3.134	3.155	3.153	3.161	3.126	3.034	3.061	3.068	3.039
IL-12 + IL-15 + IL-18		2.9765	0.135424	4	3.1335	0.025723	4	3.02625	0.060945	4		IL-12 + IL-15 + IL-18	2.87	2.854	3.056	3.126	3.132	3.125	3.169	3.108	3.012	3.001	2.977	3.115
LPS		0.07375	0.009811	4	0.10475	0.01912	4	0.073	0.008042	4		LPS	0.074	0.062	0.073	0.086	0.129	0.111	0.091	0.088	0.069	0.085	0.068	0.07
Killing assays Fig4
221
	E:T	NK-92			RPMIf			RPMIp				Radioactive particle activty	NK-92				RPMIf				RPMIp
		Mean	SD	N	Mean	SD	N	Mean	SD	N		8:1	5572	6050	6184	5734	4459	5591	6070	5650	4684	6206	5862	5532
8:1		37.3737	2.53296	4	34.9729	2.86335	4	36.0289	3.6947	4		2:1	5530	6673	6036	5564	6217	6336	5706	5514	7069	6498	5930	6325
2:1		34.3115	3.10065	4	36.8685	4.33794	4	40.2423	3.19169	4			Spontaneous cell death						Maximum cell death
												721.221 only	2535	2830	2643	2619	2057	2797	8040	6423	13391	7100	4993	16722
RAJI
	E:T	NK-92			RPMIf			RPMIp				Radioactive particle activty	NK-92				RPMIf				RPMIp
		Mean	SD	N	Mean	SD	N	Mean	SD	N		8:1	4048	4853	4801	4938	3661	4589	4625	4659	4293	4925	5122	6199
8:1		7.3701	0.335189	4	6.20853	0.169655	4	10.0422	3.32375	4		2:1	4503	4355	4747	5548	4638	4610	4517	4653	4833	4978	4633	3813
2:1		5.77556	0.959387	4	6.1124	0.295618	4	7.131	0.839577	4			Spontaneous cell death						Maximum cell death
												RAJI only	3274	3297	3318	3180	3827	3164	10137	10400	25558	23838	21052	25457
K562
	E:T	NK-92			RPMIf			RPMIp				Radioactive particle activty	NK-92				RPMIf				RPMIp
		Mean	SD	N	Mean	SD	N	Mean	SD	N		8:1	2274	2096	2599	2808	2952	2903	3334	3253	3047	3014	3402	3526
8:1		17.2005	6.75789	4	31.2861	4.54155	4	34.1772	5.40602	4		2:1	2135	2246	2269	2402	2340	2214	2451	2614	2673	2686	2920	2999
2:1		13.3686	2.31692	4	16.3654	3.58999	4	24.4257	3.90228	4			Spontaneous cell death						Maximum cell death
												K562 only	1644	1736	1723	1781	1372	1528	7086	5970	8412	6026	4905	8470
Supporting Information S1
TNFα		NK-92			RPMIf			RPMIp				OD 650nm	NK-92				RPMIf				RPMIp
		Mean	SD	N	Mean	SD	N	Mean	SD	N		untreated	0.662	0.662	0.501	0.46	0.491	0.434	0.384	0.326	0.316	0.266	0.277	0.292
untreated		1	0.185764	4	1	0.172199	4	1	0.075201	4		A549	0.518	0.572	0.46	0.451	0.47	0.439	0.391	0.366	0.375	0.28	0.29	0.31
A549		0.875711	0.098554	4	1.01896	0.11448	4	1.09036	0.148378	4		CIR	0.644	0.5	0.437	0.451	0.44	0.392	0.367	0.313	0.315	0.344	0.289	0.281
CIR		0.889278	0.16561	4	0.924771	0.129348	4	1.06777	0.098963	4		RKO	0.455	0.48	0.487	0.467	0.505	0.428	0.413	0.369	0.328	0.319	0.298	0.311
RKO		0.826696	0.024813	4	1.04893	0.13863	4	1.09122	0.044233	4		T47D	0.476	0.496	0.529	0.479	0.495	0.463	0.414	0.377	0.338	0.296	0.303	0.275
T47D		0.866521	0.042569	4	1.06973	0.127661	4	1.053	0.091022	4		RAJI	0.454	0.442	0.429	0.433	0.438	0.385	0.354	0.318	0.31	0.291	0.273	0.271
RAJI		0.769365	0.019415	4	0.914373	0.124368	4	0.994787	0.063282	4		K562	0.468	0.455	0.456	0.403	0.48	0.407	0.379	0.352	0.313	0.279	0.278	0.285
K562		0.779869	0.050665	4	0.989602	0.134838	4	1.00347	0.057201	4		721.221	0.935	0.613	0.515	0.43	0.459	0.439	0.37	0.329	0.323	0.259	0.254	0.287
721221		1.09103	0.386651	4	0.976758	0.147742	4	0.975673	0.11013	4
TNFα		NK-92			RPMIf			RPMIp				OD 650nm	NK-92				RPMIf				RPMIp
		Mean	SD	N	Mean	SD	N	Mean	SD	N		untreated	0.413	0.381	0.362	0.341	0.338	0.324	0.299	0.261	0.259	0.264	0.261	0.338
untreated		1	0.081671	4	1	0.110536	4	1	0.136857	4		IL-15	0.431	0.422	0.441	0.417	0.41	0.383	0.379	0.298	0.288	0.27	0.272	0.298
IL-15		1.14295	0.028225	4	1.20295	0.158218	4	1.00535	0.047653	4		IL-12	0.433	0.407	0.396	0.376	0.391	0.362	0.316	0.295	0.255	0.297	0.253	0.298
IL-12		1.07682	0.063494	4	1.1162	0.142455	4	0.983066	0.089595	4		IL-12 + IL-18	0.636	0.638	0.658	0.595	0.699	1.09	0.503	0.403	0.323	0.333	0.305	0.369
IL-12 + IL-18		1.68804	0.07064	4	2.2054	0.9935	4	1.18538	0.09608	4		IL-12 + IL-15 + IL-18	0.769	0.762	0.738	0.651	0.742	0.61	0.493	0.385	0.375	0.335	0.339	0.404
IL-12 + IL-15 + IL-18		1.95057	0.145127	4	1.82488	0.502548	4	1.29501	0.116157	4		LPS	0.42	0.413	0.432	0.421	0.408	0.389	0.345	0.325	0.277	0.283	0.278	0.339
LPS		1.12625	0.020983	4	1.20049	0.12554	4	1.04902	0.106769	4
